# Supplementary material for: Electronic structure and geometries of o-carborane derived cyclic structures [{μ-1,2-(C2B10H10)nMn}Agm]z−, M = {Au, Hg}, n = {3, 4}, m = {0, 1, 2}, z = {n − m, −m}
Source: Royal Society of Chemistry journal article supplement (doi:10.1039/c2dt31047c), 2012-01-01
Supplement: c2dt31047c.pdf [file c2dt31047c.pdf]

## Electronic Structure and Geometries of *o*-Carborane Derived Cyclic Structures $[\mu\text{-}1,2\text{-}(\text{C}_2\text{B}_{10}\text{H}_{10})\text{M}]_n\text{Ag}_m$ , $\text{M} = \{\text{Au}, \text{Hg}\}$ , $n = \{3, 4\}$ , $m = \{0, 1, 2\}$

G. Aullón<sup>(a)</sup>, A. Laguna<sup>(b)</sup>, J.M. Oliva<sup>(c)</sup>

### *Supplementary Material*

**Table S1.** Electronic energies for optimized structures.

**Table S2.** NPA charges of carborane cages.

**Table S3.** Comparison of optimized geometrical parameters for  $[\mu\text{-}(1,2\text{-C}_2\text{B}_{10}\text{H}_{10})_z\text{Au}_z]^{z-}$  complexes ( $z = 3$  or  $4$ ) by two basis sets: (first entry) 6-31g\* and LANL2DZ, and (second entry in italics) 6-311g\* and TZVP [**Error! Bookmark not defined.**], for main and metal elements, respectively.

**Table S4.** Cartesian coordinates of the optimized geometries for the  $[\mu\text{-}(1,2\text{-C}_2\text{B}_{10}\text{H}_{10})_z\text{Au}_z]^{z-}$  complexes ( $z = 3$  or  $4$ ) with the triple-zeta basis set 6-311g\* and TZVP [**Error! Bookmark not defined.**] for main and metal elements, respectively.

**Table S1.** Electronic energies for optimized structures.

| Metals System                   | Symmetry        | Stationary Point | Energy (Ha)  |
|---------------------------------|-----------------|------------------|--------------|
| Au <sub>3</sub>                 | D <sub>3h</sub> | Minimum          | -1399.216764 |
| Hg <sub>3</sub>                 | C <sub>3v</sub> | Minimum          | -1120.808854 |
| Au <sub>4</sub>                 | D <sub>4h</sub> | Minimum          | -1865.498929 |
| Au <sub>4</sub>                 | S <sub>4</sub>  | Minimum          | -1865.504370 |
| Hg <sub>4</sub>                 | D <sub>4h</sub> | Transition State | -1494.403425 |
| Hg <sub>4</sub>                 | S <sub>4</sub>  | Minimum          | -1494.411553 |
| Au <sub>3</sub> Ag              | D <sub>3h</sub> | Transition State | -1545.045514 |
| Au <sub>3</sub> Ag              | C <sub>3v</sub> | Minimum          | -1545.087780 |
| Au <sub>3</sub> Ag <sub>2</sub> | D <sub>3h</sub> | Transition State | -1690.840967 |
| Au <sub>3</sub> Ag <sub>2</sub> | C <sub>s</sub>  | Minimum          | -1690.841227 |
| Hg <sub>3</sub> Ag              | C <sub>2v</sub> | Minimum          | -1266.298884 |
| Hg <sub>3</sub> Ag              | C <sub>3v</sub> | Minimum          | -1266.316630 |
| Hg <sub>3</sub> Ag              | D <sub>3h</sub> | Transition State | -1266.252055 |
| Hg <sub>3</sub> Ag <sub>2</sub> | C <sub>s</sub>  | Minimum          | -1411.806487 |
| Au <sub>4</sub> Ag              | S <sub>4</sub>  | Minimum          | -2011.468196 |
| Au <sub>4</sub> Ag <sub>2</sub> | S <sub>4</sub>  | Minimum          | -2157.302704 |
| Hg <sub>4</sub> Ag              | C <sub>2v</sub> | Minimum          | -1639.955129 |
| Hg <sub>4</sub> Ag <sub>2</sub> | D <sub>2</sub>  | Minimum          | -1785.437349 |

**Table S2.** NPA charges of carborane cages.

| <i>Metals System</i>            | <i>Symmetry</i> | <i>Cage</i>       | <i>C</i>         | <i>B</i>       | <i>H</i>       |
|---------------------------------|-----------------|-------------------|------------------|----------------|----------------|
| Au <sub>3</sub>                 | D <sub>3h</sub> | -1.354            | -0.677           | -0.17 to +0.15 | +0.03 to +0.05 |
| Hg <sub>3</sub>                 | C <sub>3v</sub> | -1.162            | -0.768           | -0.17 to +0.13 | +0.05 to +0.09 |
| Au <sub>4</sub>                 | D <sub>4h</sub> | -1.385            | -0.684           | -0.18 to +0.15 | +0.03 to +0.05 |
| Au <sub>4</sub>                 | S <sub>4</sub>  | -1.366            | -0.674           | -0.19 to +0.15 | +0.03 to +0.06 |
| Hg <sub>4</sub>                 | D <sub>4h</sub> | -1.168            | -0.765           | -0.17 to +0.14 | +0.05 to +0.09 |
| Hg <sub>4</sub>                 | S <sub>4</sub>  | -1.166            | -0.768           | -0.17 to +0.15 | +0.05 to +0.09 |
| Au <sub>3</sub> Ag              | C <sub>3v</sub> | -1.220            | -0.682           | -0.18 to +0.14 | +0.03 to +0.06 |
| Au <sub>3</sub> Ag <sub>2</sub> | C <sub>s</sub>  | -1.096            | -0.677           | -0.17 to +0.15 | +0.02 to +0.08 |
| Hg <sub>3</sub> Ag              | C <sub>2v</sub> | -1.098(2), -0.840 | -0.769 to -0.714 | -0.16 to +0.14 | +0.05 to +0.11 |
| Hg <sub>3</sub> Ag              | C <sub>3v</sub> | -1.110            | -0.773           | -0.16 to +0.17 | +0.08 to +0.11 |
| Hg <sub>3</sub> Ag <sub>2</sub> | C <sub>s</sub>  | -1.121            | -0.766           | -0.27 to +0.14 | -0.08 to +0.11 |
| Au <sub>4</sub> Ag              | S <sub>4</sub>  | -1.221            | -0.674           | -0.17 to +0.15 | +0.04 to +0.06 |
| Au <sub>4</sub> Ag <sub>2</sub> | S <sub>4</sub>  | -1.137            | -0.678           | -0.17 to +0.15 | +0.01 to +0.07 |
| Hg <sub>4</sub> Ag              | C <sub>2v</sub> | -1.128            | -0.759           | -0.26 to +0.15 | +0.06 to +0.10 |
| Hg <sub>4</sub> Ag <sub>2</sub> | D <sub>2</sub>  | -1.110            | -0.758           | -0.25 to +0.14 | +0.04 to +0.11 |

**Table S3.** Comparison of optimized geometrical parameters for  $[\mu-(1,2-C_2B_{10}H_{10})_zAu_z]^{z-}$  complexes ( $z = 3$  or  $4$ ) by two basis sets: (first entry) 6-31g\* and LANL2DZ, and (second entry in italics) 6-311g\* and TZVP [Error! Bookmark not defined.], for main and metal elements, respectively.

| Core                                   | M···M               | M···X        | M-C          | C-C          | C-M-C        | C-Cage-C    |
|----------------------------------------|---------------------|--------------|--------------|--------------|--------------|-------------|
| Au <sub>3</sub> (C <sub>3h</sub> )     | 3.779               | 2.182        | 2.104        | 1.725        | 178.5        | 58.5        |
| <i>Au<sub>3</sub> (C<sub>3h</sub>)</i> | <i>3.784</i>        | <i>2.185</i> | <i>2.100</i> | <i>1.739</i> | <i>178.2</i> | <i>58.2</i> |
| Au <sub>4</sub> (S <sub>4</sub> )      | 4.051, 5.728        | 2.864        | 2.108        | 1.727        | 173.8        | 66.9        |
| <i>Au<sub>4</sub> (S<sub>4</sub>)</i>  | <i>4.094, 5.790</i> | <i>2.895</i> | <i>2.105</i> | <i>1.746</i> | <i>173.0</i> | <i>67.8</i> |
| Au <sub>4</sub> (D <sub>4h</sub> )     | 4.351, 6.153        | 3.077        | 2.112        | 1.731        | 166.7        | 76.9        |
| <i>Au<sub>4</sub> (D<sub>4h</sub>)</i> | <i>4.366, 6.175</i> | <i>3.087</i> | <i>2.107</i> | <i>1.745</i> | <i>166.9</i> | <i>76.9</i> |

**Table S4.** Cartesian coordinates (Å) of the optimized geometries for the  $[\mu-(1,2-C_2B_{10}H_{10})_zAu_z]^{z-}$  complexes ( $z = 3$  or  $4$ ) with the triple-zeta basis set 6-311g\* and TZVP [Error! Bookmark not defined.] for main and metal elements, respectively.

$[\mu-(1,2-C_2B_{10}H_{10})_3Au_3]^{3-}$  -  $D_{3h}$  symmetry

| Atom | X         | Y         | Z         |
|------|-----------|-----------|-----------|
| Au   | 0.000000  | 2.177738  | 0.000000  |
| Au   | -1.895668 | -1.093382 | 0.000000  |
| Au   | 1.895668  | -1.093382 | 0.000000  |
| C    | -2.099574 | 2.212105  | 0.000000  |
| C    | -2.972169 | 0.709971  | 0.000000  |
| B    | -2.926612 | 1.687627  | 1.405464  |
| B    | -2.993421 | 3.382757  | 0.879900  |
| B    | -2.993421 | 3.382757  | -0.879900 |
| B    | -2.926612 | 1.687627  | -1.405464 |
| B    | -4.432781 | 0.905069  | 0.880423  |
| B    | -4.475085 | 2.586268  | 1.441130  |
| B    | -4.519589 | 3.638175  | 0.000000  |
| B    | -4.475085 | 2.586268  | -1.441130 |
| B    | -4.432781 | 0.905069  | -0.880423 |
| B    | -5.412179 | 2.103235  | 0.000000  |
| C    | 2.099574  | 2.212105  | 0.000000  |
| C    | 2.972169  | 0.709971  | 0.000000  |
| B    | 2.926612  | 1.687627  | -1.405464 |
| B    | 2.993421  | 3.382757  | -0.879900 |
| B    | 2.993421  | 3.382757  | 0.879900  |
| B    | 2.926612  | 1.687627  | 1.405464  |
| B    | 4.432781  | 0.905069  | -0.880423 |
| B    | 4.475085  | 2.586268  | -1.441130 |
| B    | 4.519589  | 3.638175  | 0.000000  |
| B    | 4.475085  | 2.586268  | 1.441130  |
| B    | 4.432781  | 0.905069  | 0.880423  |
| B    | 5.412179  | 2.103235  | 0.000000  |
| C    | -0.870809 | -2.926217 | 0.000000  |
| C    | 0.870809  | -2.926217 | 0.000000  |
| B    | 0.000000  | -3.378026 | 1.403753  |
| B    | -1.432489 | -4.288713 | 0.880071  |
| B    | -1.432489 | -4.288713 | -0.880071 |
| B    | 0.000000  | -3.378026 | -1.403753 |
| B    | 1.432489  | -4.288713 | 0.880071  |
| B    | 0.000000  | -5.169055 | 1.440266  |
| B    | -0.888245 | -5.736586 | 0.000000  |
| B    | 0.000000  | -5.169055 | -1.440266 |
| B    | 1.432489  | -4.288713 | -0.880071 |
| B    | 0.888245  | -5.736586 | 0.000000  |
| H    | -1.536546 | -6.743237 | 0.000000  |
| H    | -2.441631 | -4.187354 | -1.500307 |
| H    | -2.441631 | -4.187354 | 1.500307  |
| H    | 0.000000  | -5.761108 | -2.479003 |
| H    | 0.000000  | -2.683833 | -2.362495 |
| H    | 2.441631  | -4.187354 | -1.500307 |
| H    | 1.536546  | -6.743237 | 0.000000  |
| H    | 0.000000  | -5.761108 | 2.479003  |
| H    | 0.000000  | -2.683833 | 2.362495  |
| H    | 2.441631  | -4.187354 | 1.500307  |
| H    | 2.326434  | 1.337722  | 2.363826  |
| H    | 4.851317  | -0.019524 | 1.499584  |
| H    | 4.851317  | -0.019524 | -1.499584 |
| H    | 2.326434  | 1.337722  | -2.363826 |

Table S4 (cont)

|   |          |          |           |
|---|----------|----------|-----------|
| H | 2.398473 | 4.205214 | -1.498622 |
|---|----------|----------|-----------|

|   |           |           |           |
|---|-----------|-----------|-----------|
| H | 2.398473  | 4.205214  | 1.498622  |
| H | 5.064383  | 4.704563  | 0.000000  |
| H | 4.986750  | 2.884621  | -2.479719 |
| H | 4.986750  | 2.884621  | 2.479719  |
| H | 6.608341  | 2.048950  | 0.000000  |
| H | -2.326434 | 1.337722  | -2.363826 |
| H | -2.398473 | 4.205214  | -1.498622 |
| H | -4.986750 | 2.884621  | -2.479719 |
| H | -5.064383 | 4.704563  | 0.000000  |
| H | -2.398473 | 4.205214  | 1.498622  |
| H | -6.608341 | 2.048950  | 0.000000  |
| H | -4.986750 | 2.884621  | 2.479719  |
| H | -2.326434 | 1.337722  | 2.363826  |
| H | -4.851317 | -0.019524 | 1.499584  |
| H | -4.851317 | -0.019524 | -1.499584 |

$[\mu-(1,2-C_2B_{10}H_{10})_4Au_4]^{4+}$  -  $D_{4h}$  symmetry

| Atom | X         | Y         | Z         |
|------|-----------|-----------|-----------|
| Au   | 0.000000  | 3.087483  | 0.000000  |
| Au   | -3.087483 | 0.000000  | 0.000000  |
| C    | -2.093378 | 3.327596  | 0.000000  |
| C    | -3.327596 | 2.093378  | 0.000000  |
| B    | -3.030409 | 3.030409  | 1.400779  |
| B    | -2.670440 | 4.691504  | 0.880283  |
| B    | -2.670440 | 4.691504  | -0.880283 |
| B    | -3.030409 | 3.030409  | -1.400779 |
| B    | -4.691504 | 2.670440  | 0.880283  |
| B    | -4.301675 | 4.301675  | 1.440476  |
| B    | -4.077656 | 5.331838  | 0.000000  |
| B    | -4.301675 | 4.301675  | -1.440476 |
| B    | -4.691504 | 2.670440  | -0.880283 |
| B    | -5.331838 | 4.077656  | 0.000000  |
| C    | 2.093378  | 3.327596  | 0.000000  |
| C    | 3.327596  | 2.093378  | 0.000000  |
| B    | 3.030409  | 3.030409  | -1.400779 |
| B    | 2.670440  | 4.691504  | -0.880283 |
| B    | 2.670440  | 4.691504  | 0.880283  |
| B    | 3.030409  | 3.030409  | 1.400779  |
| B    | 4.691504  | 2.670440  | -0.880283 |
| B    | 4.301675  | 4.301675  | -1.440476 |
| B    | 4.077656  | 5.331838  | 0.000000  |
| B    | 4.301675  | 4.301675  | 1.440476  |
| B    | 4.691504  | 2.670440  | 0.880283  |
| B    | 5.331838  | 4.077656  | 0.000000  |
| C    | -3.327596 | -2.093378 | 0.000000  |
| C    | -2.093378 | -3.327596 | 0.000000  |
| B    | -3.030409 | -3.030409 | 1.400779  |
| B    | -4.691504 | -2.670440 | 0.880283  |
| B    | -4.691504 | -2.670440 | -0.880283 |
| B    | -3.030409 | -3.030409 | -1.400779 |
| B    | -2.670440 | -4.691504 | 0.880283  |
| B    | -4.301675 | -4.301675 | 1.440476  |
| B    | -5.331838 | -4.077656 | 0.000000  |
| B    | -4.301675 | -4.301675 | -1.440476 |
| B    | -2.670440 | -4.691504 | -0.880283 |
| B    | -4.077656 | -5.331838 | 0.000000  |

Table S4 (cont)

|    |           |           |           |
|----|-----------|-----------|-----------|
| H  | -6.504117 | -4.326978 | 0.000000  |
| H  | -5.336115 | -1.889215 | -1.501471 |
| H  | -5.336115 | -1.889215 | 1.501471  |
| H  | -4.719119 | -4.719119 | -2.481269 |
| H  | -2.541981 | -2.541981 | -2.362430 |
| H  | -1.889215 | -5.336115 | -1.501471 |
| H  | -4.326978 | -6.504117 | 0.000000  |
| H  | -4.719119 | -4.719119 | 2.481269  |
| H  | -2.541981 | -2.541981 | 2.362430  |
| H  | -1.889215 | -5.336115 | 1.501471  |
| H  | 2.541981  | 2.541981  | 2.362430  |
| H  | 5.336115  | 1.889215  | 1.501471  |
| H  | 5.336115  | 1.889215  | -1.501471 |
| H  | 2.541981  | 2.541981  | -2.362430 |
| H  | 1.889215  | 5.336115  | -1.501471 |
| H  | 1.889215  | 5.336115  | 1.501471  |
| H  | 4.326978  | 6.504117  | 0.000000  |
| H  | 4.719119  | 4.719119  | -2.481269 |
| H  | 4.719119  | 4.719119  | 2.481269  |
| H  | 6.504117  | 4.326978  | 0.000000  |
| H  | -2.541981 | 2.541981  | -2.362430 |
| H  | -1.889215 | 5.336115  | -1.501471 |
| H  | -4.719119 | 4.719119  | -2.481269 |
| H  | -4.326978 | 6.504117  | 0.000000  |
| H  | -1.889215 | 5.336115  | 1.501471  |
| H  | -6.504117 | 4.326978  | 0.000000  |
| H  | -4.719119 | 4.719119  | 2.481269  |
| H  | -2.541981 | 2.541981  | 2.362430  |
| H  | -5.336115 | 1.889215  | 1.501471  |
| H  | -5.336115 | 1.889215  | -1.501471 |
| Au | 0.000000  | -3.087483 | 0.000000  |
| Au | 3.087483  | 0.000000  | 0.000000  |
| B  | 2.670440  | -4.691504 | -0.880283 |
| B  | 2.670440  | -4.691504 | 0.880283  |
| B  | 3.030409  | -3.030409 | 1.400779  |
| B  | 4.301675  | -4.301675 | -1.440476 |
| B  | 4.691504  | -2.670440 | -0.880283 |
| B  | 4.077656  | -5.331838 | 0.000000  |
| H  | 1.889215  | -5.336115 | -1.501471 |
| B  | 4.691504  | -2.670440 | 0.880283  |
| B  | 4.301675  | -4.301675 | 1.440476  |
| H  | 1.889215  | -5.336115 | 1.501471  |
| H  | 2.541981  | -2.541981 | 2.362430  |
| B  | 5.331838  | -4.077656 | 0.000000  |
| H  | 4.719119  | -4.719119 | -2.481269 |
| H  | 5.336115  | -1.889215 | -1.501471 |
| H  | 4.326978  | -6.504117 | 0.000000  |
| H  | 5.336115  | -1.889215 | 1.501471  |
| H  | 4.719119  | -4.719119 | 2.481269  |
| H  | 6.504117  | -4.326978 | 0.000000  |
| C  | 3.327596  | -2.093378 | 0.000000  |
| B  | 3.030409  | -3.030409 | -1.400779 |
| H  | 2.541981  | -2.541981 | -2.362430 |
| C  | 2.093378  | -3.327596 | 0.000000  |

---

Table S4 (cont)

$[\mu-(1,2-C_2B_{10}H_{10})_4Au_4]^{4+}$  -  $S_4$  symmetry

| Atom | X         | Y         | Z         |
|------|-----------|-----------|-----------|
| Au   | -2.438923 | 1.559658  | 0.000855  |
| Au   | -1.559725 | -2.438768 | -0.000942 |
| C    | -3.510540 | 0.122916  | -1.102893 |
| C    | -3.135529 | -1.582478 | -1.102586 |
| B    | -4.517109 | -0.992379 | -0.280445 |
| B    | -5.212180 | 0.319662  | -1.256154 |
| B    | -4.148203 | 0.554278  | -2.638551 |
| B    | -2.820575 | -0.618767 | -2.483046 |
| B    | -4.597871 | -2.474525 | -1.256561 |
| B    | -5.917891 | -1.300450 | -1.359986 |
| B    | -5.675402 | -0.338470 | -2.843861 |
| B    | -4.177465 | -0.917099 | -3.623503 |
| B    | -3.533187 | -2.240676 | -2.638750 |
| B    | -5.293530 | -2.071409 | -2.843731 |
| C    | -1.582531 | 3.135517  | 1.102565  |
| C    | 0.122902  | 3.510421  | 1.102988  |
| B    | -0.992259 | 4.517002  | 0.280379  |
| B    | -2.474478 | 4.597961  | 1.256384  |
| B    | -2.240865 | 3.533284  | 2.638605  |
| B    | -0.619032 | 2.820484  | 2.483083  |
| B    | 0.319792  | 5.211983  | 1.256206  |
| B    | -1.300262 | 5.917854  | 1.359887  |
| B    | -2.071418 | 5.293627  | 2.843555  |
| B    | -0.917311 | 4.177445  | 3.623477  |
| B    | 0.554152  | 4.148005  | 2.638715  |
| B    | -0.338450 | 5.675300  | 2.843867  |
| C    | -0.122933 | -3.510408 | 1.103016  |
| C    | 1.582501  | -3.135476 | 1.102627  |
| B    | 0.618916  | -2.820228 | 2.483032  |
| B    | -0.554256 | -4.147745 | 2.638819  |
| B    | -0.319808 | -5.211955 | 1.256504  |
| B    | 0.992288  | -4.517113 | 0.280636  |
| B    | 2.240759  | -3.532981 | 2.638767  |
| B    | 0.917153  | -4.176994 | 3.623669  |
| B    | 0.338353  | -5.674988 | 2.844283  |
| B    | 1.300252  | -5.917780 | 1.360393  |
| B    | 2.474456  | -4.597887 | 1.256734  |
| B    | 2.071316  | -5.293290 | 2.844000  |
| H    | -0.127045 | -6.587922 | 3.466724  |
| H    | -1.238473 | -5.729745 | 0.707080  |
| H    | -1.638782 | -3.914802 | 3.065390  |
| H    | 1.538439  | -7.000594 | 0.908416  |
| H    | 1.003439  | -4.568604 | -0.902511 |
| H    | 3.525507  | -4.682741 | 0.707629  |
| H    | 2.877196  | -5.926406 | 3.466237  |
| H    | 0.879398  | -4.005145 | 4.806525  |
| H    | 0.375102  | -1.710106 | 2.807600  |
| H    | 3.127929  | -2.867123 | 3.065247  |
| H    | -0.375253 | 1.710413  | 2.807851  |
| H    | 1.638653  | 3.915121  | 3.065381  |
| H    | 1.238492  | 5.729667  | 0.706744  |
| H    | -1.003344 | 4.568297  | -0.902775 |
| H    | -3.525498 | 4.682737  | 0.707207  |
| H    | -3.128067 | 2.867504  | 3.065144  |



Table S4 (cont)

|    |           |           |           |
|----|-----------|-----------|-----------|
| H  | -2.877325 | 5.926859  | 3.465641  |
| H  | -1.538407 | 7.000596  | 0.907716  |
| H  | -0.879624 | 4.005796  | 4.806365  |
| H  | 0.126931  | 6.588337  | 3.466171  |
| H  | -1.710554 | -0.374825 | -2.807855 |
| H  | -3.915450 | 1.638845  | -3.065101 |
| H  | -4.005775 | -0.879259 | -4.806361 |
| H  | -6.588468 | 0.126887  | -3.466132 |
| H  | -5.730021 | 1.238249  | -0.706642 |
| H  | -5.926656 | -2.877326 | -3.465901 |
| H  | -7.000620 | -1.538738 | -0.907850 |
| H  | -4.568514 | -1.003574 | 0.902715  |
| H  | -4.682609 | -3.525618 | -0.707494 |
| H  | -2.867332 | -3.127766 | -3.065387 |
| Au | 2.438926  | -1.559768 | 0.000671  |
| Au | 1.559752  | 2.438668  | -0.000774 |
| B  | 4.148216  | -0.554144 | -2.638686 |
| B  | 5.212225  | -0.319690 | -1.256282 |
| B  | 4.517172  | 0.992237  | -0.280407 |
| B  | 4.177466  | 0.917353  | -3.623465 |
| B  | 3.533204  | 2.240811  | -2.638553 |
| B  | 5.675415  | 0.338631  | -2.843926 |
| H  | 3.915452  | -1.638658 | -3.065359 |
| B  | 4.597910  | 2.474497  | -1.256348 |
| B  | 5.917933  | 1.300435  | -1.359939 |
| H  | 5.730076  | -1.238341 | -0.706885 |
| H  | 4.568598  | 1.003300  | 0.902754  |
| B  | 5.293547  | 2.071573  | -2.843577 |
| H  | 4.005755  | 0.879653  | -4.806323 |
| H  | 2.867342  | 3.127952  | -3.065070 |
| H  | 6.588469  | -0.126649 | -3.466271 |
| H  | 4.682659  | 3.525524  | -0.707156 |
| H  | 7.000669  | 1.538672  | -0.907794 |
| H  | 5.926662  | 2.877566  | -3.465658 |
| C  | 3.135566  | 1.582438  | -1.102470 |
| B  | 2.820598  | 0.618886  | -2.483019 |
| H  | 1.710570  | 0.374981  | -2.807830 |
| C  | 3.510601  | -0.122954 | -1.102950 |

---
